# Supplementary material for: A novel symmetrical mononuclear zinc complex: synthesis, crystal structure, Hirshfeld surface analysis, DFT calculations, and application in a supercapacitor electrode
Source: Royal Society of Chemistry journal article supplement (doi:10.1039/d4nj02698e), 2024-01-01
Supplement: d4nj02698e1.pdf [file d4nj02698e1.pdf]

**Novel symmetrical mononuclear zinc complex: synthesis, crystal structure, Hirshfeld surface analysis, DFT calculations, and application for supercapacitor electrode.**

Houria LAKHDARI-IDIR<sup>a</sup>, Chafia AIT RAMDANE-TERBOUCHE<sup>a</sup>, Achour TERBOUCHE<sup>a</sup>, Katia AIT KACI AZZOU<sup>b</sup>, Khaled AIT RAMDANE<sup>b</sup>, Thierry ROISNEL<sup>c</sup>, Fodil AOULMI<sup>a</sup>, Amar MANSERI<sup>d</sup>, Didier HAUCHARD<sup>c</sup>,

<sup>a</sup>Centre de Recherche Scientifique et Technique en Analyses Physico-chimiques(CRAPC), BP384, Bou-Ismaïl, RP 42004, Tipasa, Algeria.

<sup>b</sup>Laboratoire Sciences des Matériaux, Faculté de Chimie, Université USTHB, 16111 Algiers, Algeria.

<sup>c</sup>Université Rennes, ENSC Rennes, CNRS, ISCR-UMR6226, Rennes 35000, France.

<sup>d</sup>Research Center in Semiconductors Technology for Energetics (CRTSE), 02 Bd Frantz Fanon, les 07 merveilles BP: 140, 16038, Algiers, Algeria.

\*Corresponding author: [achour\\_t@yahoo.fr](mailto:achour_t@yahoo.fr); [achour.terbouche@crapc.dz](mailto:achour.terbouche@crapc.dz); Tel.: +213 660 37 01 15  
[chafia\\_ait@yahoo.fr](mailto:chafia_ait@yahoo.fr); [chafia.ait.ramdane@crapc.dz](mailto:chafia.ait.ramdane@crapc.dz); Tel.: +213 552 16 21 18; fax: +213.24.325.774

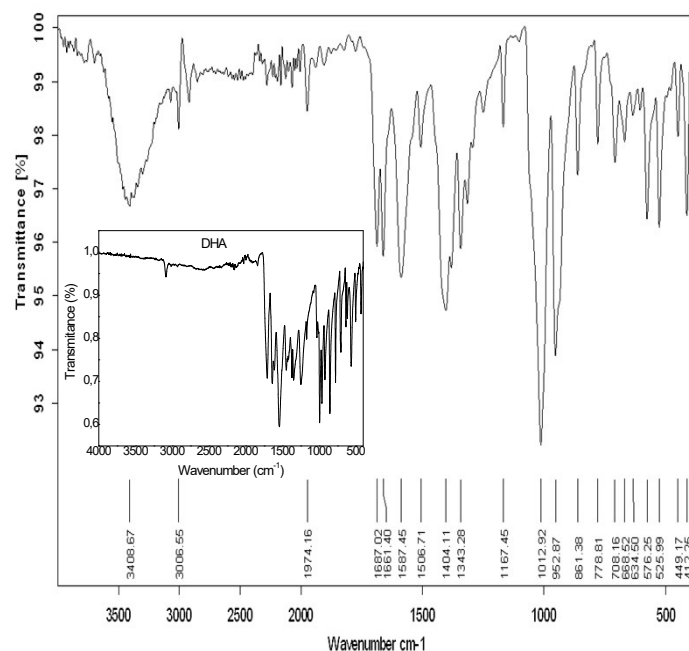

**Fig S1.** ATR spectra of Zn(DHA)<sub>2</sub>(DMSO)<sub>2</sub> complex and DHA.

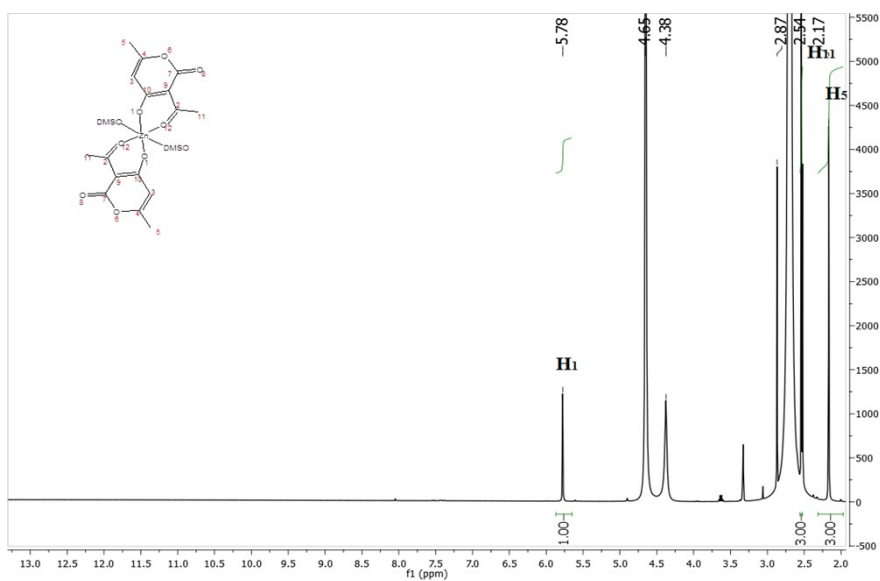

**Fig S2.**  $^1\text{H}$  NMR spectrum of  $\text{Zn}(\text{DHA})_2(\text{DMSO})_2$  complex.

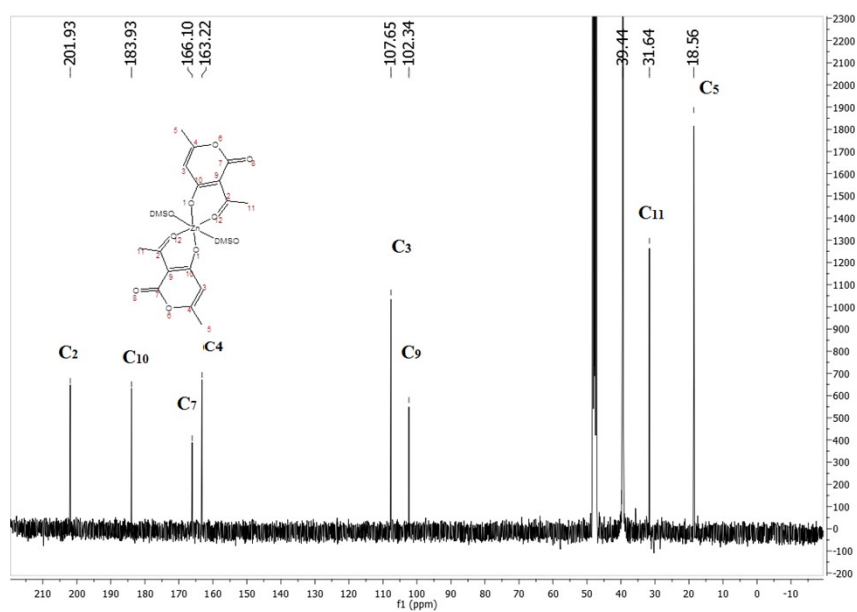

**Fig S3.**  $^{13}\text{C}$  NMR spectrum of  $\text{Zn}(\text{DHA})_2(\text{DMSO})_2$  complex.

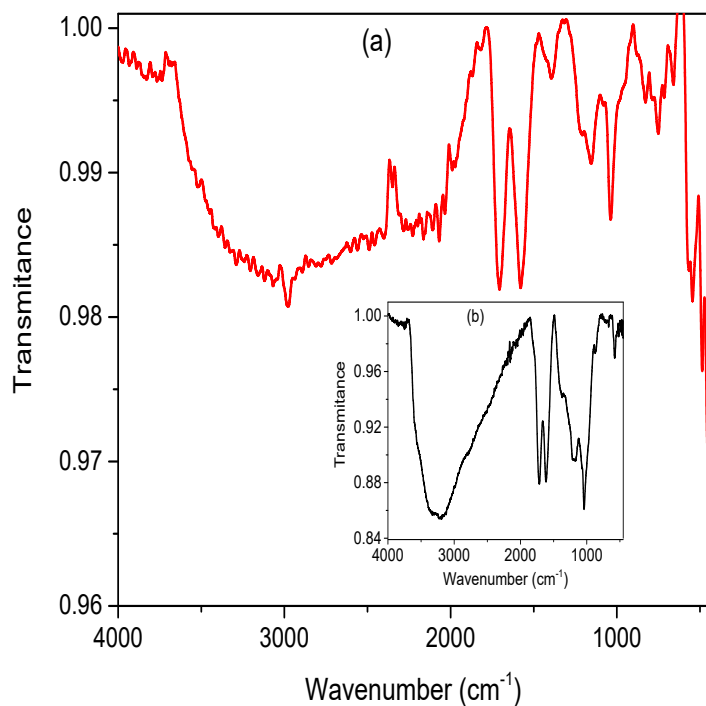

**Fig S4.** ATR spectra of (a)  $\text{Zn(DHA)}_2(\text{DMSO})_2/\text{GO}$  and (b) GO material.

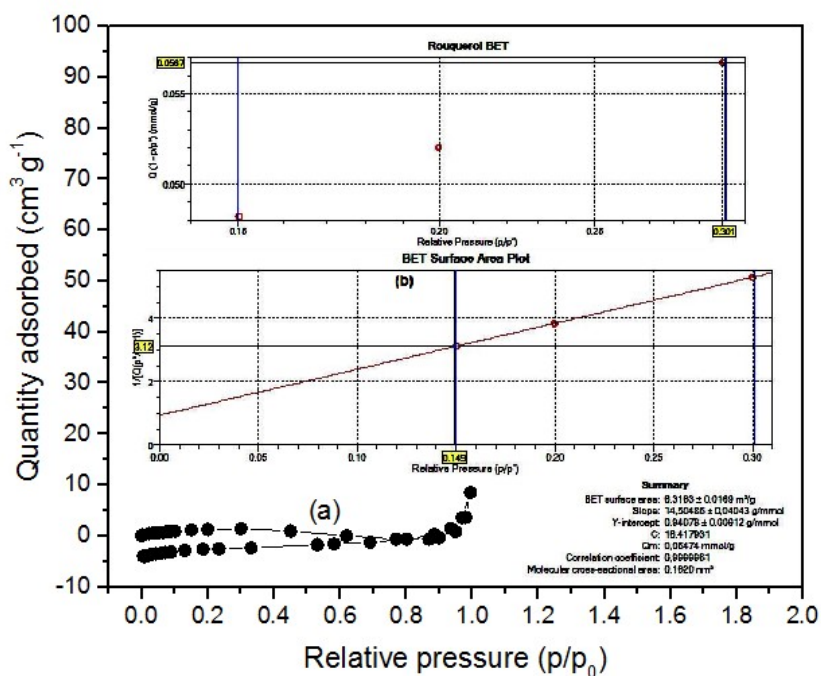

**Fig S5.** BET analysis of  $\text{Zn(DHA)}_2(\text{DMSO})_2/\text{GO}$  material: (a) Nitrogen sorption isotherms and (b) BET surface area Plot.
